# Supplementary material
Source: PubMed Central journal article supplement (PMC4047379)
Supplement: supp_M114.558510_jbc.M114.558510-1.pdf [file supp_M114.558510_jbc.M114.558510-1.pdf]

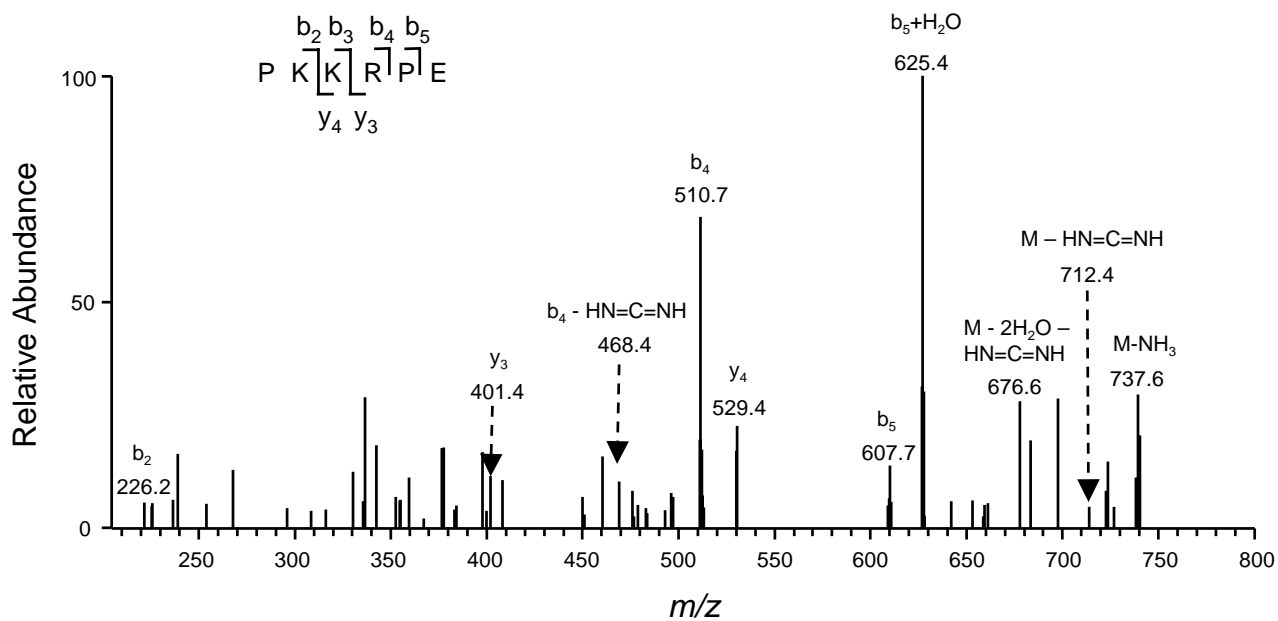

**Fig. S1.** MS/MS/MS of  $y_6$  ion observed in the MS/MS of the di-methylated form of the peptide  ${}_1\text{APKKRPE}_7$

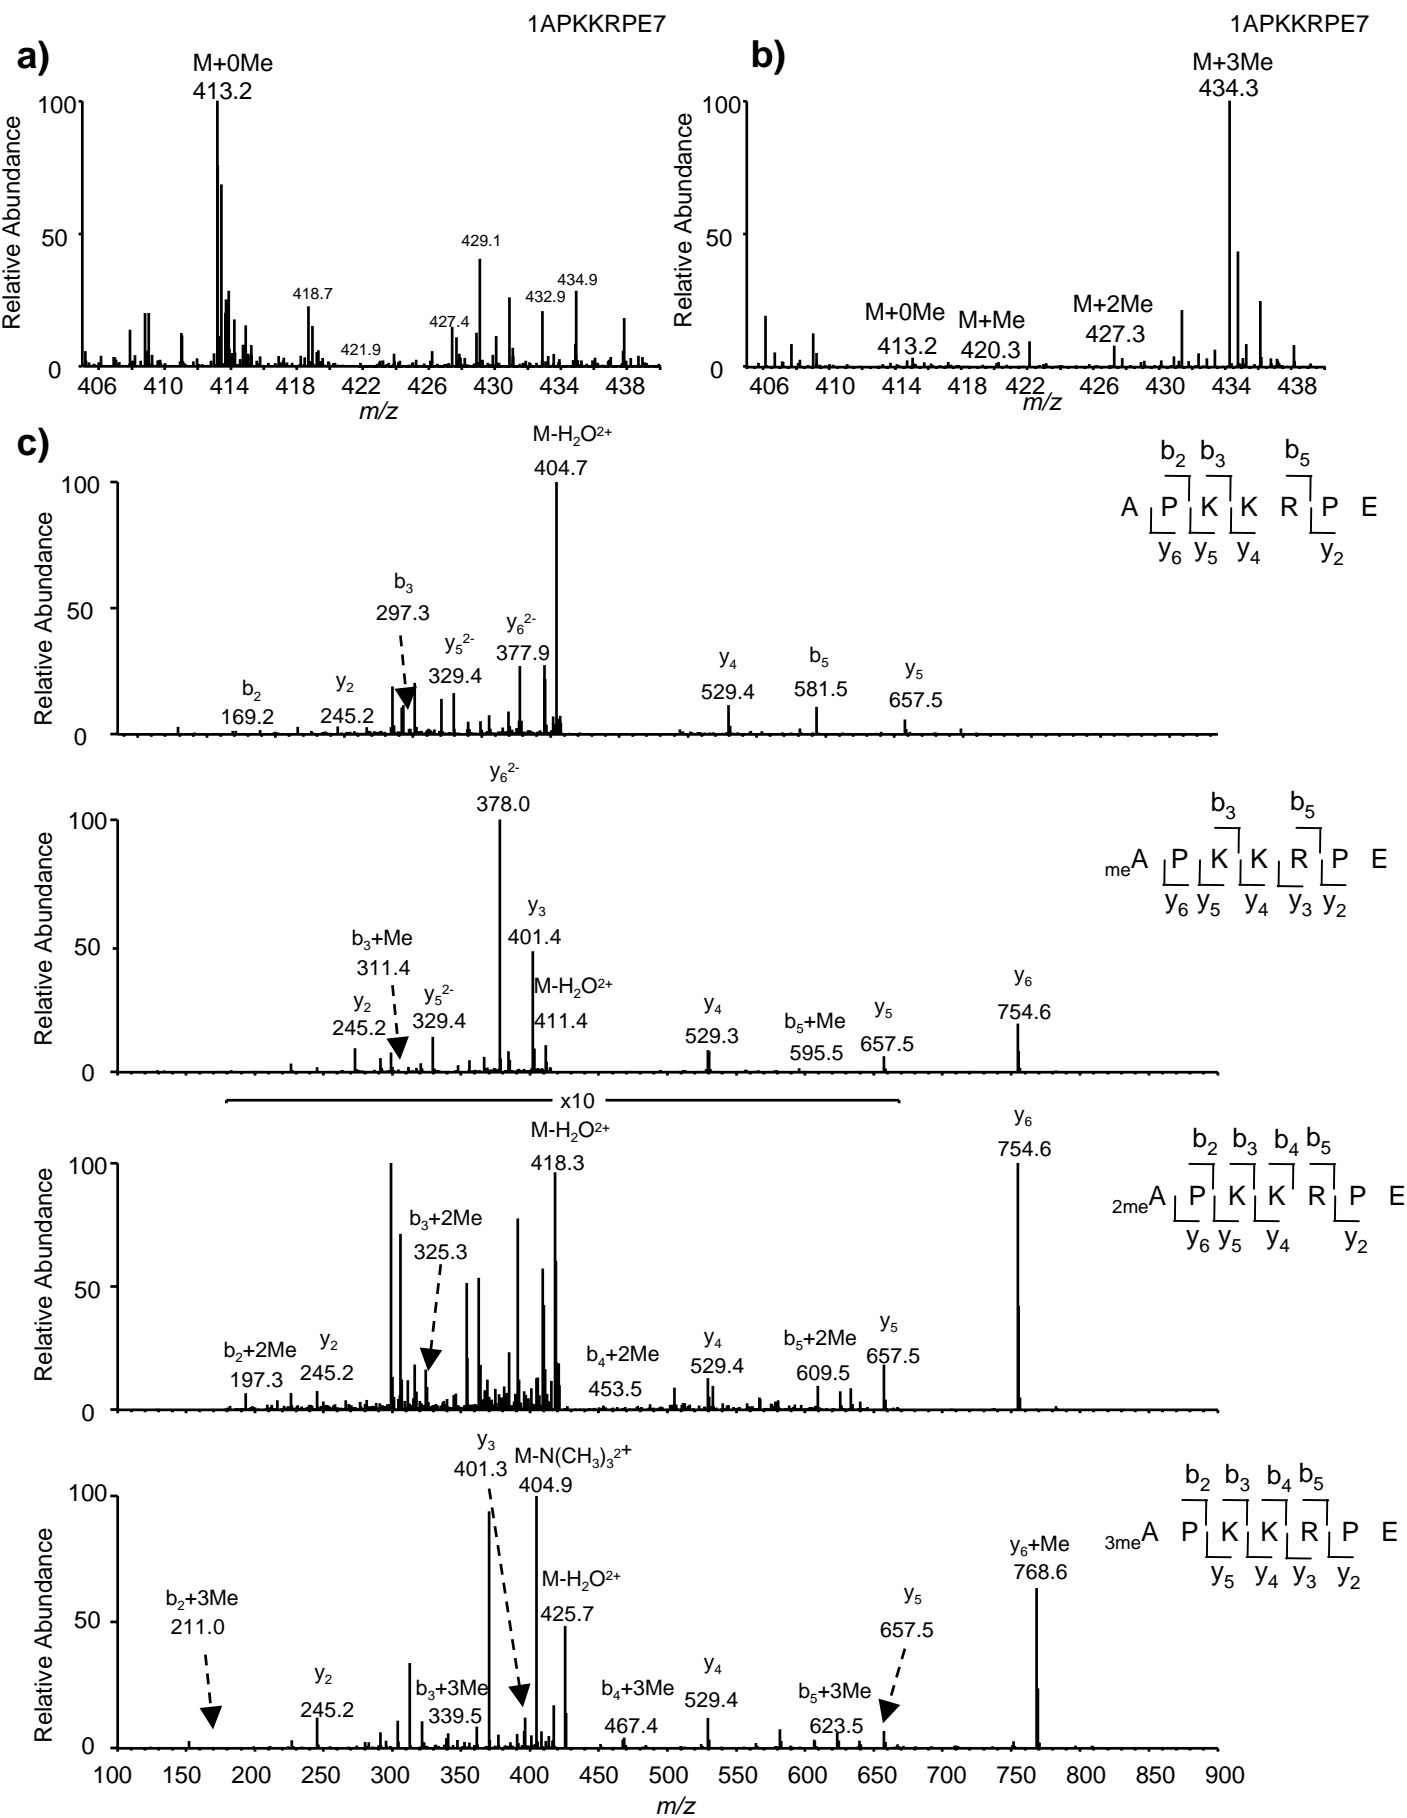

**Fig. S2.** ESI-MS/MS of unmodified, mono-, di-, tri- $\alpha$ -N-methylated forms of the peptide  $_1$ APKKRPE $_7$  from X-factor-cleaved recombinant DDB2: (a) without the addition of NRMT, (b) with the addition of NRMT. (c) ESI-MS/MS of unmodified, mono-, di-, tri- $\alpha$ -N-methylated forms of the peptide  $_1$ AAKKRPE $_7$  arising from Glu-C digestion of X-factor-cleaved recombinant DDB2 with incubation with NRMT. Certain regions of the spectra were amplified to visualize better the peaks for some fragment ions.

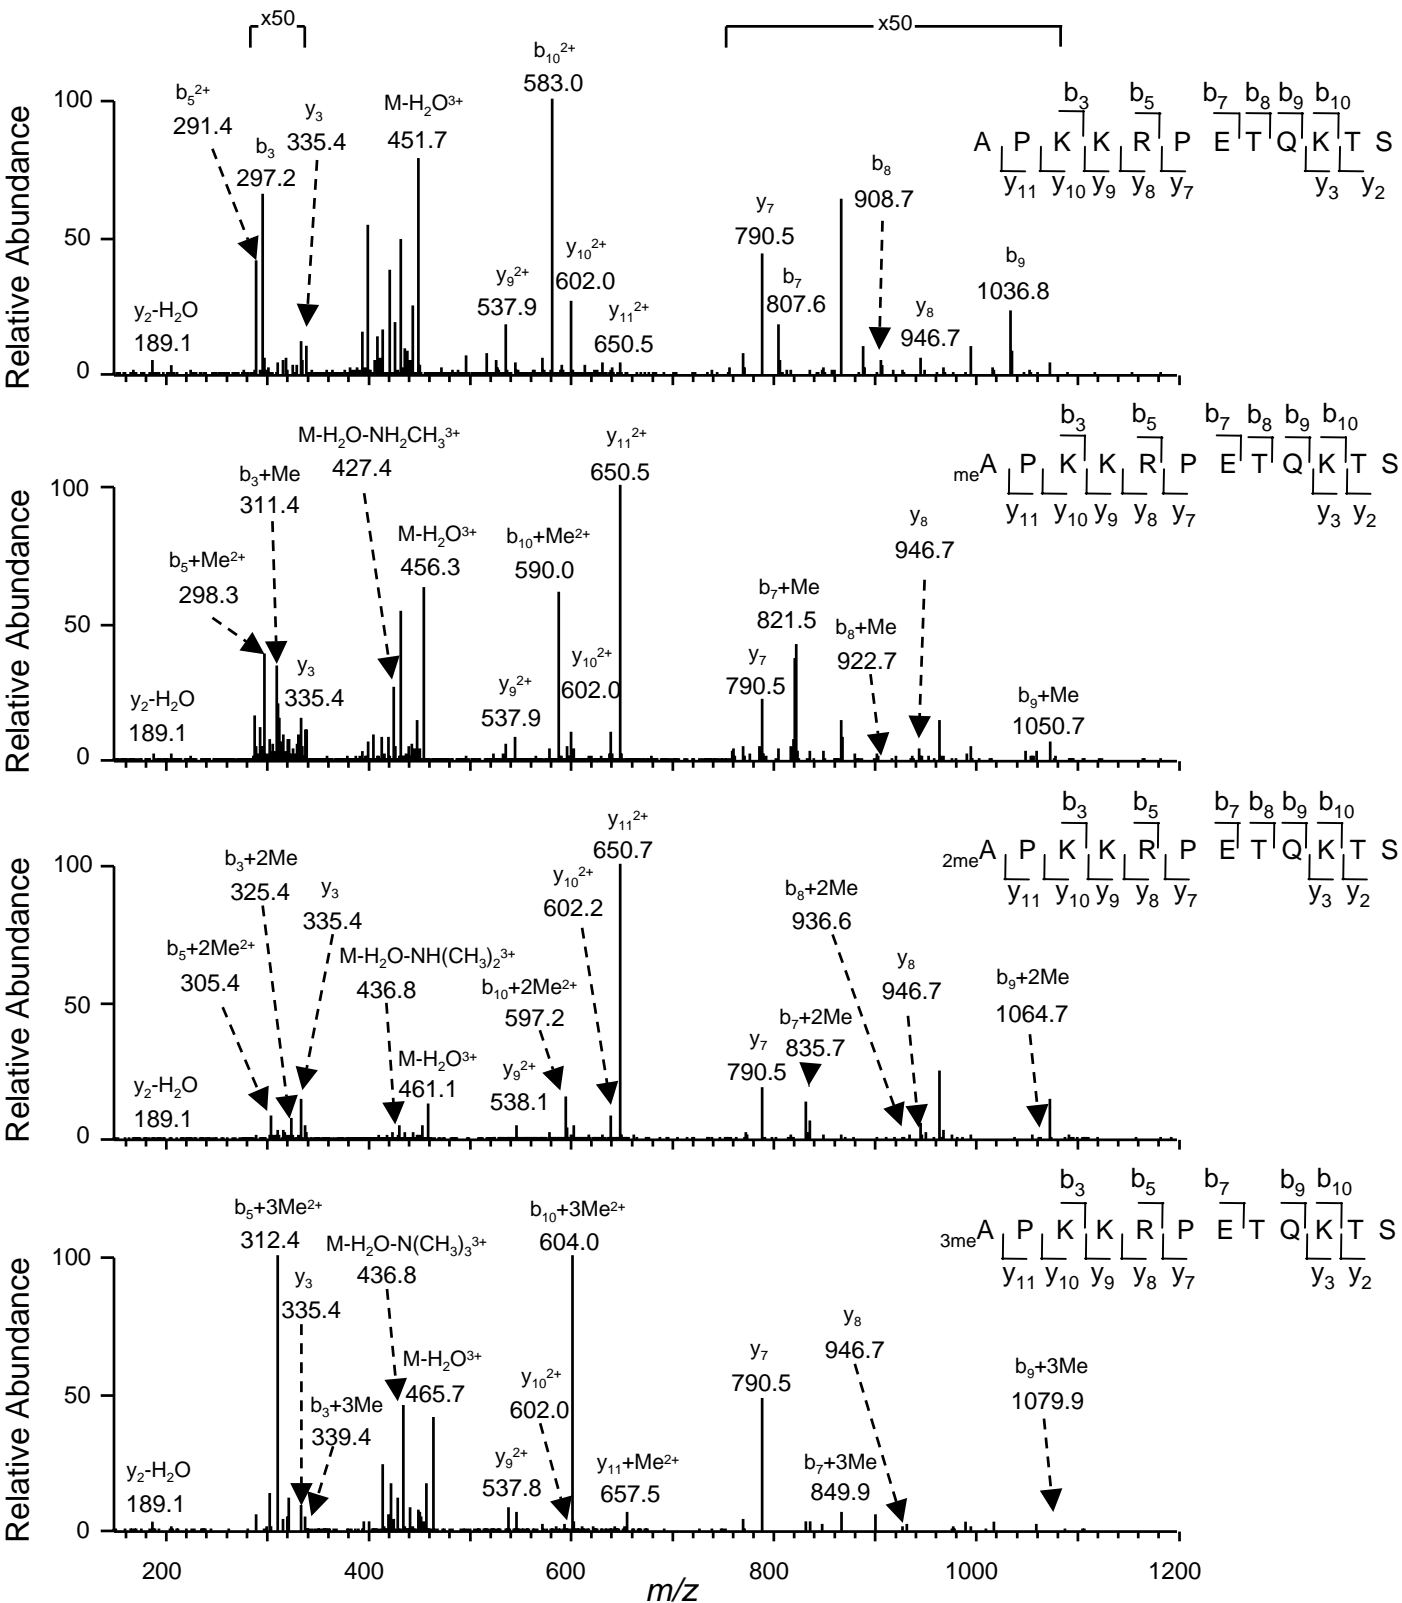

**Fig. S3.** ESI-MS/MS of unmodified as well as mono-, di-, tri- $\alpha$ -N-methylated forms of the peptide  ${}^1\text{APKKRPETQKTS}_{12}$ . Certain regions of the spectra were amplified to visualize better the peaks for some fragment ions.

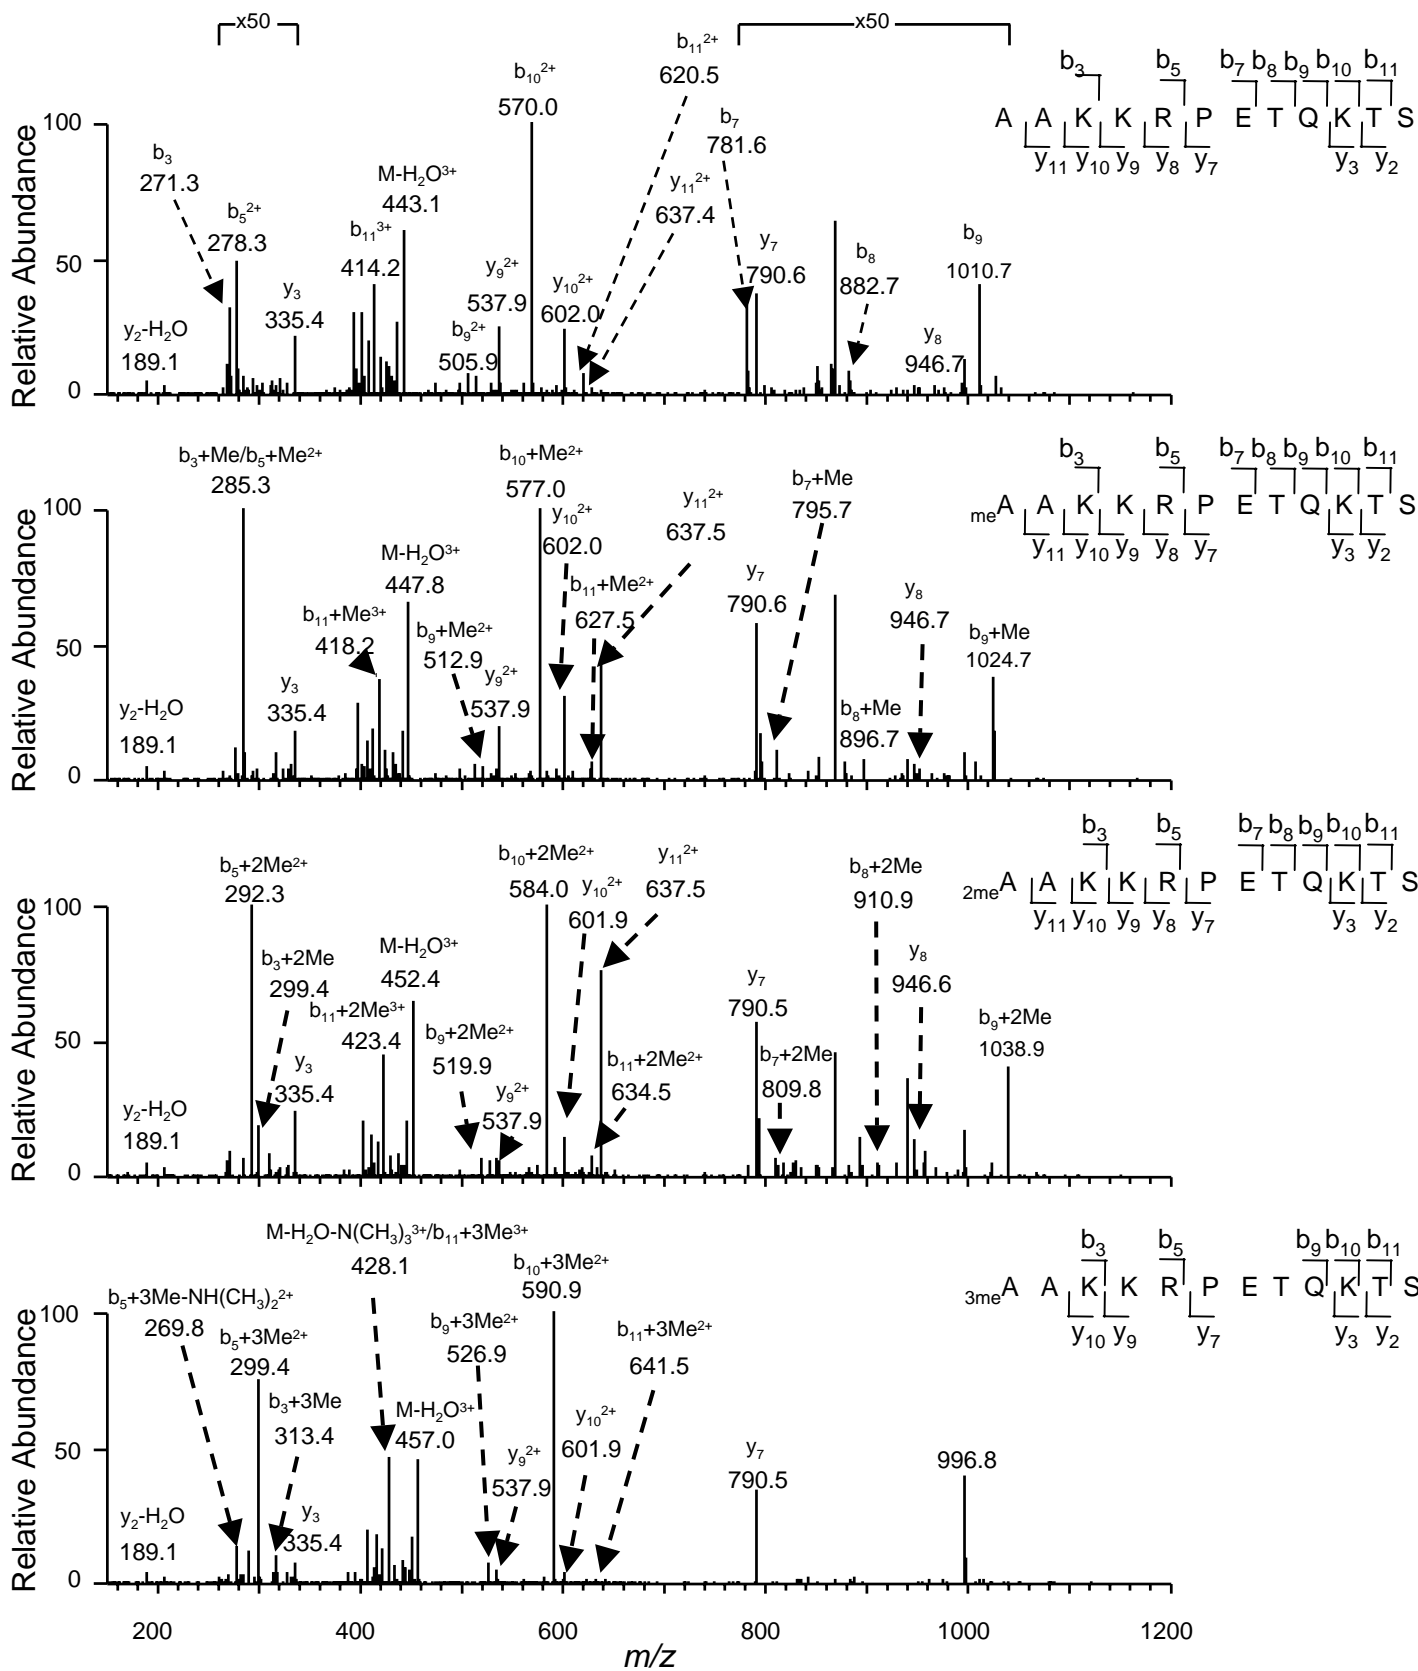

**Fig. S4.** ESI-MS/MS of unmodified as well as mono-, di-, tri- $\alpha$ -N-methylated forms of the peptide  ${}^1\text{AAKKRPETQKTS}_{12}$ . Certain regions of the spectra were amplified to visualize better the peaks for some fragment ions.

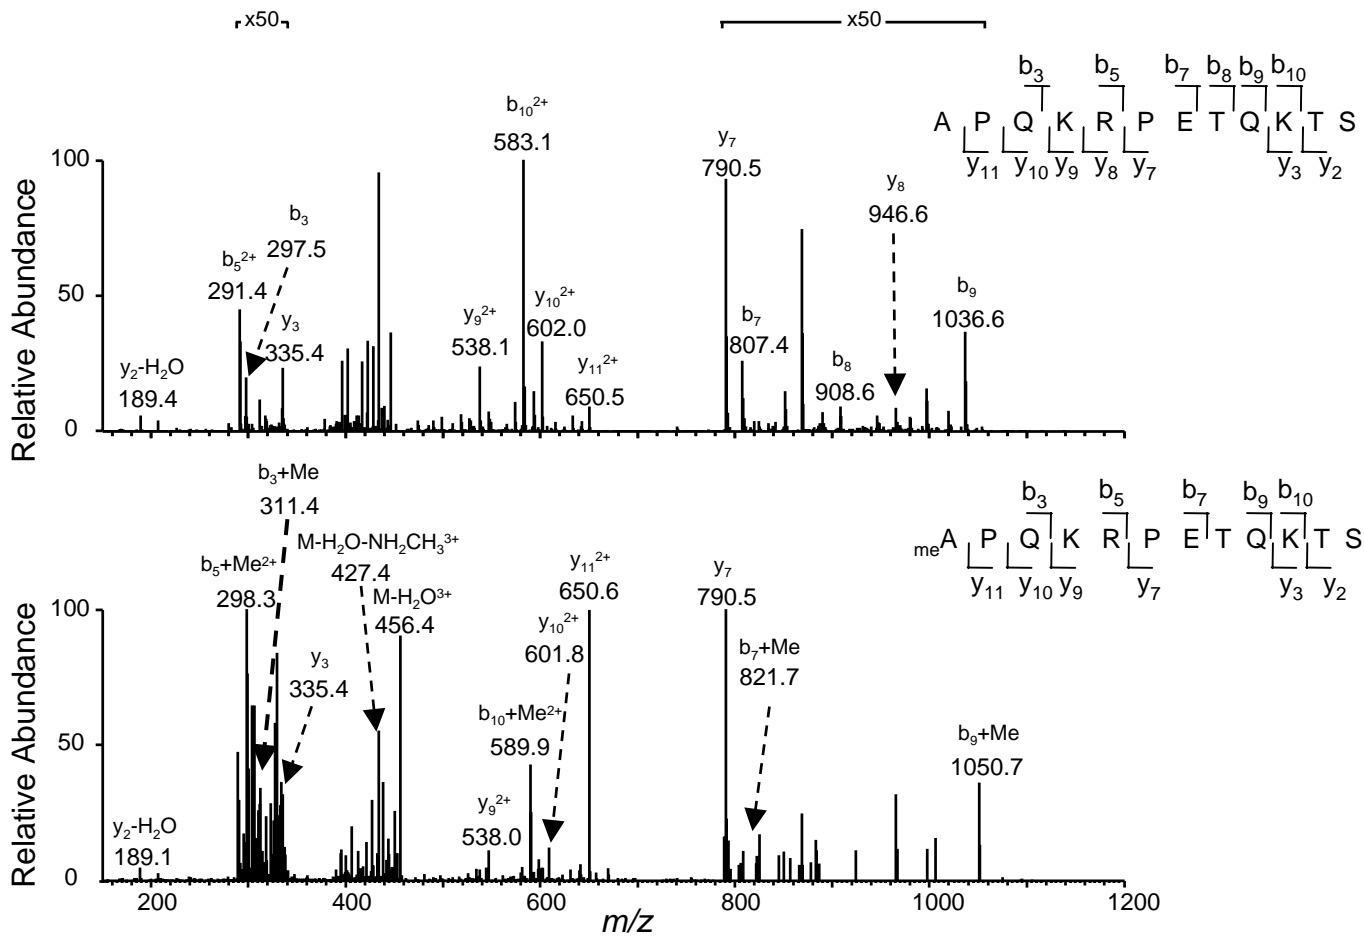

**Fig. S5.** ESI-MS/MS of unmodified and monomethylated forms of the peptide  ${}^1\text{APQKRPE TQKTS}_{12}$ . Certain regions of the spectrum were amplified to visualize better the peaks for some fragment ions.

$_1\text{APQKRPE}_7$

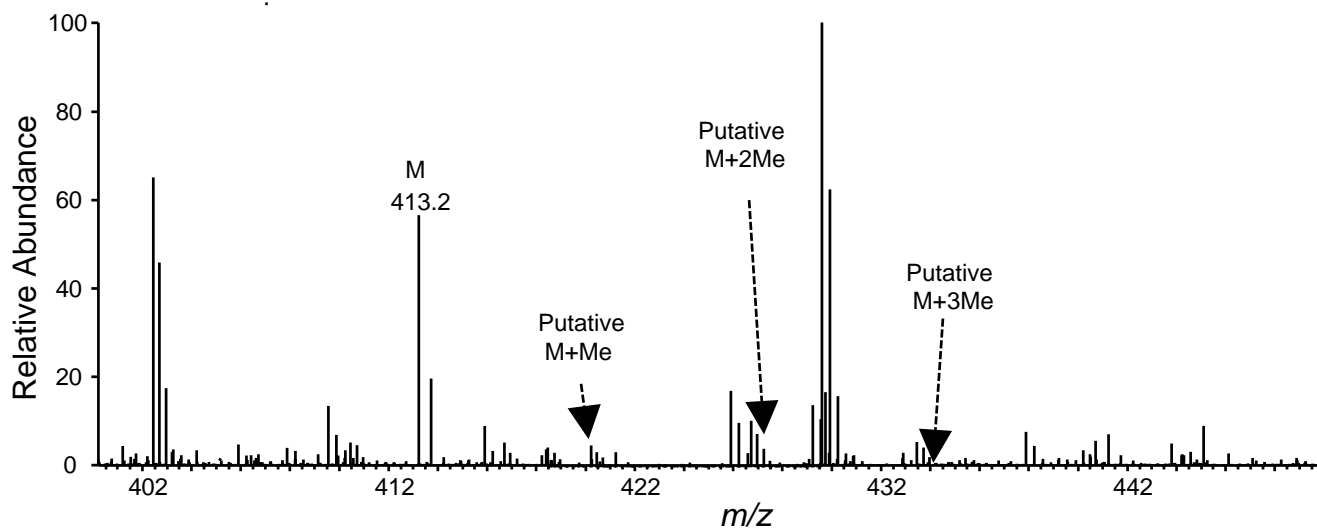

**Fig. S6.** ESI-MS of unmodified forms of the peptide  $_1\text{APQKRPE}_7$ .
